# Supplementary material
Source: PubMed Central journal article supplement (PMC2590723)
Supplement: tpc.108.058628_1.pdf [file tpc.108.058628_1.pdf]

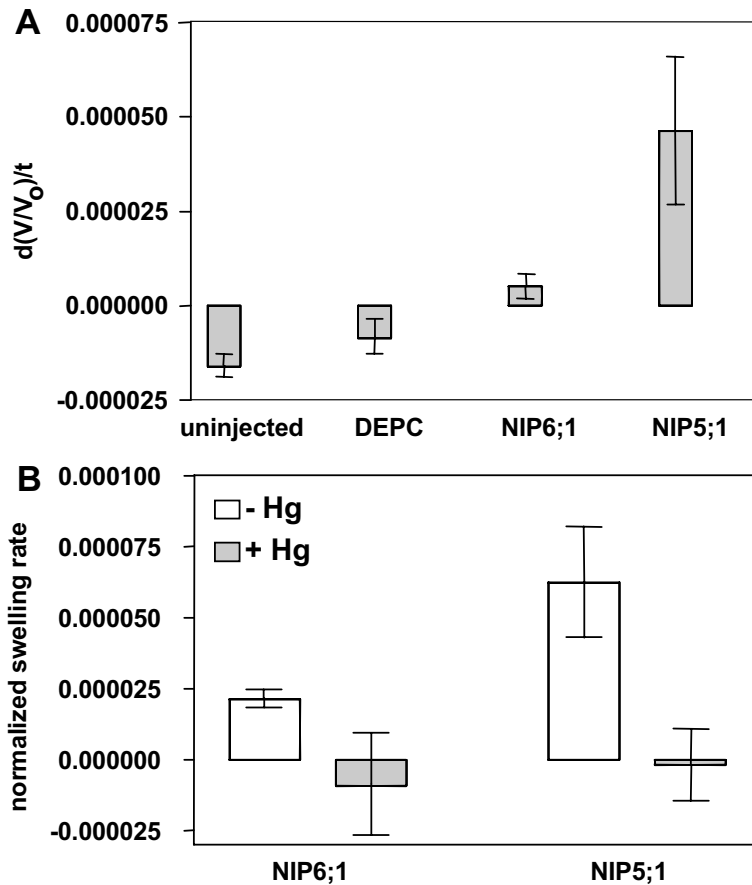

**Supplemental Figure 1. Comparison of swelling rates of control and NIP oocytes and mercury inhibition of swelling.**

**(A)** Comparison of the boric acid induced swelling rates of negative control oocytes (uninjected or DEPC-water “mock” injected oocytes) and NIP5;1- and NIP6;1- expressing oocytes was done as described in the Methods. Error bars show the SEM (n=7 oocytes for each value); **(B)** Comparison of the boric acid-induced oocyte swelling properties of NIP5;1 and NIP6;1 in the absence (-Hg) and the presence of 1 mM HgCl<sub>2</sub> (+Hg) are shown. The error bars show the SEM (n=6 oocytes for each value).

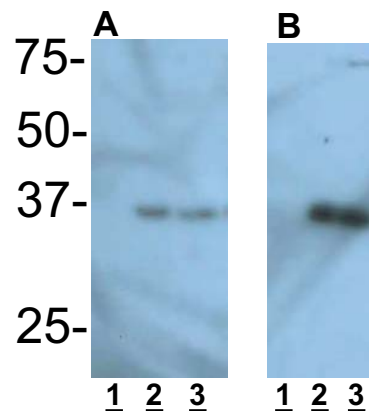

**Supplemental Figure 2. FLAG-tag Western blot of *Xenopus* oocyte lysates.**

5 (A) and 20 (B) µg of lysate protein from NIP5;1- as well as NIP6;1- expressing oocytes were separated on a 12.5% SDS-PAGE gel, blotted to PVDF, and probed with the anti-FLAG antibody. Lane 1: uninjected oocyte lysate, lane 2: NIP5;1-lysate, lane 3: NIP6;1- lysate. The position of the molecular mass markers (kDa) are indicated to the left of the blot.

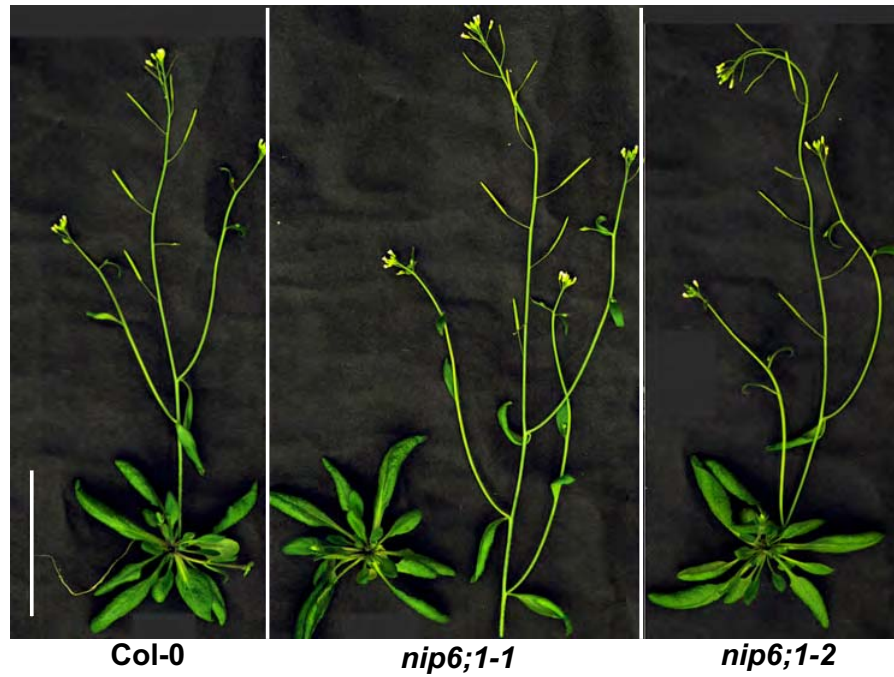

**Supplemental Figure 3. Plant growth under high B conditions.**

Wild-type plants and the *NIP6;IT*-DNA insertion lines were grown hydroponically for 28 days supplied with 100  $\mu$ M B under long-day conditions (16 h/ 8 h light/dark cycle). Bar=50 mm.

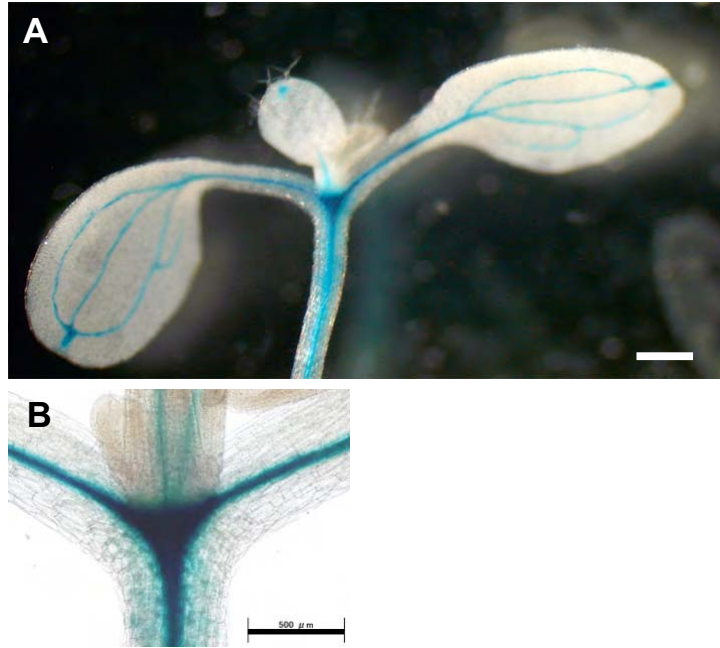

**Supplemental Figure 4. GUS Staining in *Pro-NIP6;1-GUS* transgenic seedlings.**

*Pro-NIP6;1-GUS* transgenic plants were grown on solid medium for 10 days supplied with 100  $\mu\text{M}$  B and stained with 5-bromo-4-chloro-3-indolyl-b-D-glucuronic acid. **(A)** Whole shoot, **(B)** Close-up of the nodal area. Bar=1 mm in (A), bar=500  $\mu\text{m}$  in (B).

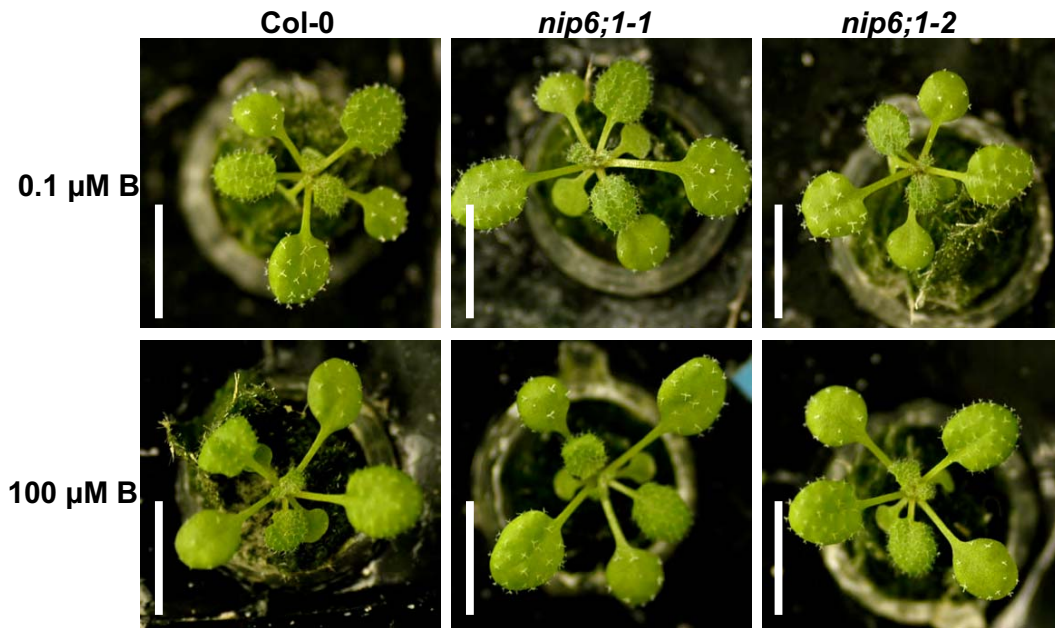

**Supplemental Figure 5. Plant growth of NIP6;1T-DNA insertion lines for 14 days.**

Wild-type plants and the *NIP6;1* T-DNA insertion lines were grown hydroponically for 14 days supplied with 0.1 and 100 μM B under short-day conditions (10 h/14 h light/dark cycle). Bar =10 mm.
